# Supplementary material for: Distinct effects of β1 integrin on cell proliferation and cellular signaling in MDA-MB-231 breast cancer cells
Source: PubMed Central journal article supplement (PMC4700444; doi:10.1038/srep18430), 2016-01-05
Supplement: srep18430-s1.pdf [file srep18430-s1.pdf]

**Supplementary Information**

**Distinct effects of  $\beta 1$  integrin on cell proliferation and cellular signaling  
in MDA-MB-231 breast cancer cells**

Sicong Hou<sup>1</sup>, Tomoya Isaji<sup>1</sup>, Qinglei Hang<sup>1</sup>, Sanghun Im<sup>1</sup>, Tomohiko Fukuda<sup>1</sup> & Jianguo Gu<sup>1</sup>

<sup>1</sup>Division of Regulatory Glycobiology, Institute of Molecular Biomembrane and Glycobiology,

Tohoku Pharmaceutical University, Sendai, Miyagi, 981-8558, Japan.

Correspondence and requests for materials should be addressed to J.G. (e-mail:

[jgu@tohoku-pharm.ac.jp](mailto:jgu@tohoku-pharm.ac.jp)); Tel: +81-22-727-0216; Fax: +81-22-727-0078

Figure 2B

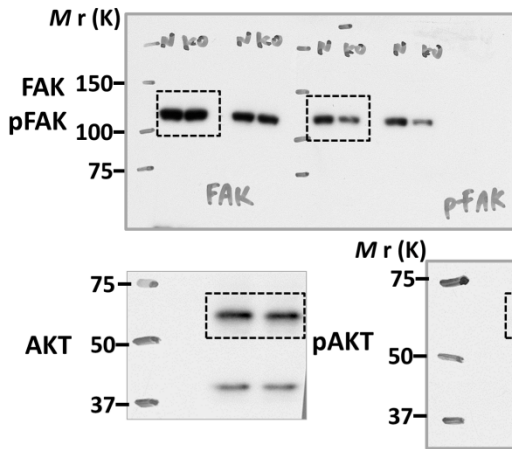

Figure 5A

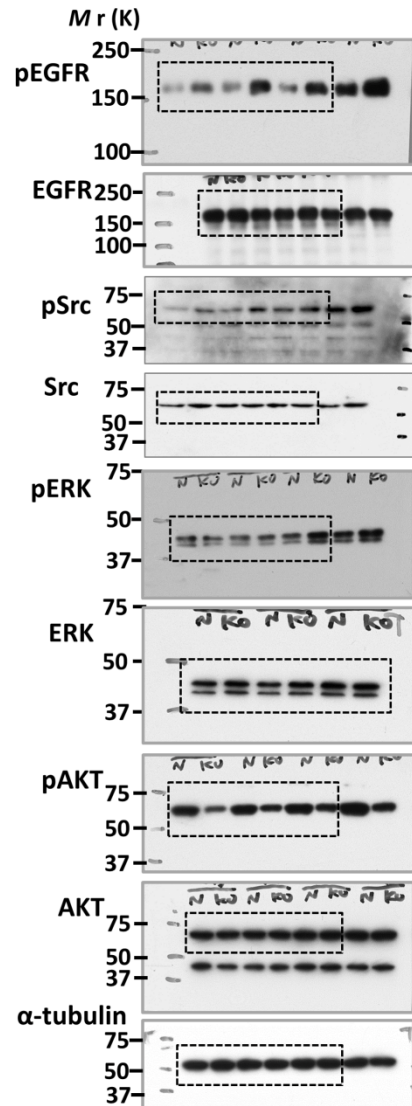

Figure 5D

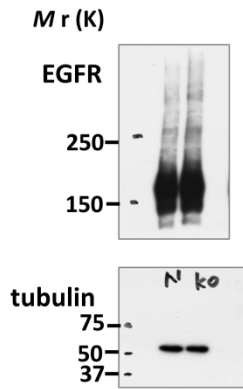

Figure 6A

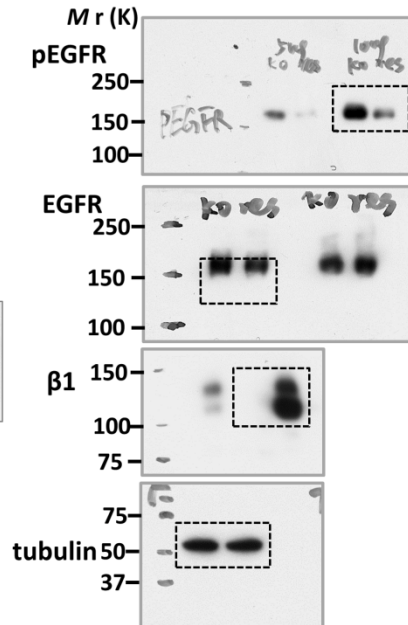

Supplementary Figure. Uncropped scans for the main western blots illustrated in Fig.2, 5 and 6.

Supplementary Figure: Uncropped, full-size scans of western blots

Uncropped scans for the main western blots illustrated in Fig.2, 5 and 6.
